# Supplementary material for: Catalyst-free valorization of poly-3-hydroxybutyrate to crotonic acid
Source: Royal Society of Chemistry journal article supplement (doi:10.1039/d1re00273b), 2021-01-01
Supplement: d1re00273b1.pdf [file d1re00273b1.pdf]

## *Supplementary information*

### **Catalyst-free Valorization of Poly-3-hydroxybutyrate to Crotonic Acid**

Shimin Kang, Rujie Chen, Jinxia Fu, Jianhao Liang, Suxia Chen, Lijun Lu, Rongrong Miao

#### **Contents**

Figure S1. CA in visualization reactor with the presence of cyclohexane solvent. A: Reactor at 30 °C before heating and stirring; B: Reactor at 30 °C with 500 RPM stirring; C: Reactor heating to 36 °C with 500 RPM stirring; D: Reactor heating to 120°C with 500 RPM stirring; E: Reactor heating to 190 °C with 500 RPM stirring.

Figure S2. CA in visualization reactor in the absence of solvent. A: Reactor at 30 °C before heating and stirring; B: Reactor at 30 °C with 500 RPM stirring; C: Reactor heating to 59 °C with 500 RPM stirring; D: Reactor heating to 75 °C with 500 RPM stirring; E: Reactor heating to 190 °C with 500 RPM stirring.

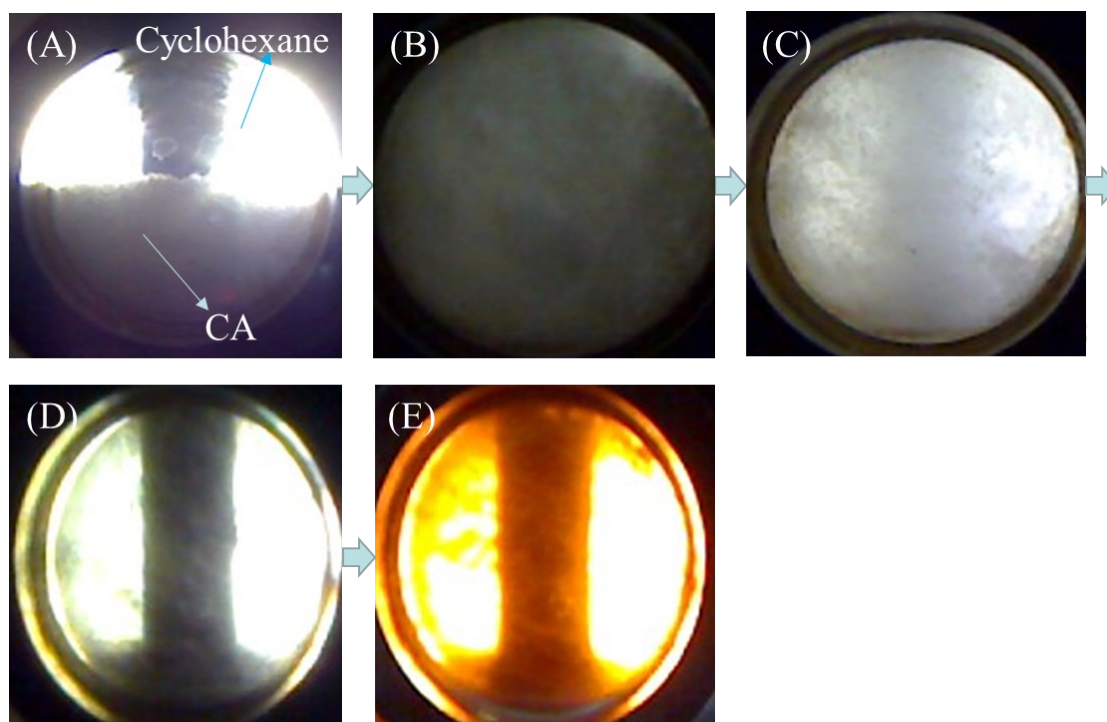

Figure S1. CA in visualization reactor with the presence of cyclohexane solvent. A: Reactor at 30 °C before heating and stirring; B: Reactor at 30 °C with 500 RPM stirring; C: Reactor heating to 36 °C with 500 RPM stirring; D: Reactor heating to 120°C with 500 RPM stirring; E: Reactor heating to 190 °C with 500 RPM stirring.

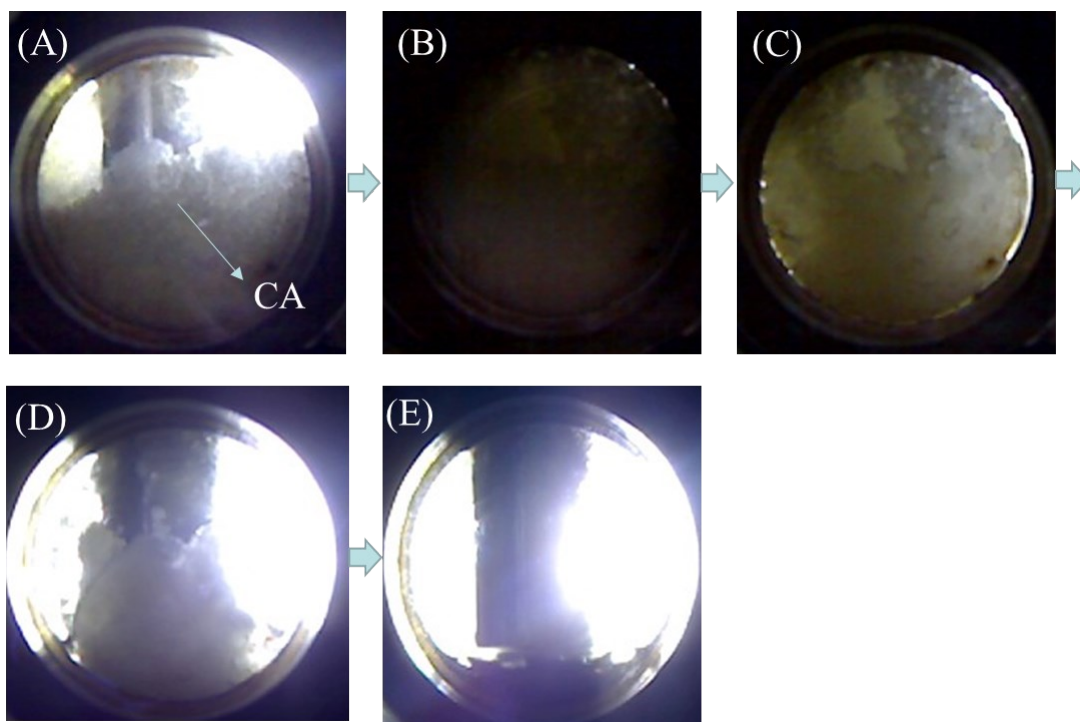

Figure S2. CA in visualization reactor in the absence of solvent. A: Reactor at 30 °C before heating and stirring; B: Reactor at 30 °C with 500 RPM stirring; C: Reactor heating to 59 °C with 500 RPM stirring; D: Reactor heating to 75 °C with 500 RPM stirring; E: Reactor heating to 190 °C with 500 RPM stirring.
